# Supplementary material
Source: Copernicus journal article supplement (doi:10.5194/acp-26-5477-2026)
Supplement: Supplementary file 1 [file acp-26-5477-2026-supplement.pdf]

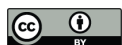

*Supplement of*

## **Observational insights into atmospheric CO<sub>2</sub> and CO at the urban canopy layer top in Metropolitan Shanghai, China**

**Shuang Fu et al.**

*Correspondence to:* Shuangxi Fang (fangsx@zjut.edu.cn)

The copyright of individual parts of the supplement might differ from the article licence.



**Table S1:** Measured CO<sub>2</sub> mixing ratio (ppm) at different sites during nearly concurrent periods.

| Observation Site                                      | Category                         | Geography                            | Period                                     | CO <sub>2</sub>                          | Reference                                              |
|-------------------------------------------------------|----------------------------------|--------------------------------------|--------------------------------------------|------------------------------------------|--------------------------------------------------------|
| Sutro Tower (STR), California, USA                    | Urban                            | 122.45°W, 37.76°N;<br>254 m a.s.l    | 2021                                       | 420.47 ± 11.23                           | NOAA <sup>a</sup>                                      |
| Yongsan Building (YSB), Seoul, South Korea            | Urban                            | 126.96°E, 37.52°N;<br>113 m a.s.l    | 2019/7–<br>2020/9                          | 442.99 ± 18.67                           | Park et al. (2021)                                     |
| Lulin (LLN), Taibei, China                            | Regional background              | 120.87°E, 23.47°N;<br>2862 m a.s.l   | 2021                                       | 417.21 ± 3.43                            | NOAA <sup>a</sup>                                      |
| King's Park (HKO), Hong Kong, China                   | Regional background              | 114.17°E, 22.31°N;<br>65 m a.s.l     | 2021                                       | 439.11 ± 6.87                            | NOAA <sup>a</sup>                                      |
| Waliguan (WLG), China                                 | Global background                | 100.54°E, 36.17°N;<br>3810 m a.s.l   | 2021/4–<br>2023/3                          | 418.95 ± 3.65                            | NOAA <sup>a</sup>                                      |
| Mauna Loa (MLO), Hawaii, USA                          | Global background                | 155.58°W, 19.54°N;<br>3397 m a.s.l   | 2021/4–<br>2023/3                          | 418.12 ± 2.54;<br>417.80 ± 2.48          | NOAA <sup>a</sup>                                      |
| Cape Grim, Tasmania, Australia                        | Global background                | 144.70°E, 40.68°S;<br>94 m a.s.l     | 2021/4–<br>2023/3                          | 413.66 ± 1.34                            | NOAA <sup>a</sup>                                      |
| Longfengshan (LFS), Harbin, Heilongjiang, China       | Regional background              | 127.60°E, 44.73°N;<br>331 m a.s.l.   | 2021–2022                                  | 422.8 ± 0.5–<br>424.9 ± 0.6              | China GHG Bulletin <sup>c</sup>                        |
| Shangdianzi (SDZ), Beijing, China                     | Regional background              | 117.12°E, 40.65°N;<br>293.3 m a.s.l. | 2021–2022                                  | 427.7 ± 0.4–<br>428.7 ± 0.4              | China GHG Bulletin <sup>c</sup>                        |
| Akedala station, Altay region, Xinjiang, China        | Regional background              | 87.93°E, 47.10°N;<br>563.3 m a.s.l.  | 2019/11;<br>2021–2022                      | ~ 410.43;<br>419.1 ± 0.6–<br>421.4 ± 1.3 | Zhao et al. (2022);<br>China GHG Bulletin <sup>c</sup> |
| Lin'an (LAN), Zhejiang, China                         | Regional background              | 119.44°E, 30.18°N;<br>138.6 m a.s.l  | 2020/11–<br>2021/10                        | 441.56 ± 15.42                           | Chen et al. (2024)                                     |
| Hangzhou (HZ), Zhejiang, China                        | Urban                            | 120.17°E, 30.22°N;<br>41.7 m a.s.l   | 2020/11–<br>2021/10                        | 446.52 ± 17.01                           | Chen et al. (2024)                                     |
| Jungfrauoch (JFJ), Switzerland                        | High-altitude mountain           | 7.99°E, 46.55°N;<br>3580 m a.s.l     | 2021/4–<br>2023/3                          | 418.30 ± 5.39                            | WDCGG <sup>d</sup>                                     |
| Heathfield (HFD), United Kingdom                      | Regional background <sup>#</sup> | 0.23°E, 50.98°N;<br>210 m a.s.l      | 2021–2023                                  | 424.84 ± 0.67                            | WDCGG <sup>d</sup>                                     |
| Hohenpeissenberg (HPB), Germany                       | Global background <sup>#</sup>   | 11.01°E, 47.80°N;<br>1065 m a.s.l    | 2021–2023                                  | 421.01 ± 0.73                            | WDCGG <sup>d</sup>                                     |
| Ispra (IPR), Italy                                    | Regional background <sup>#</sup> | 8.63°E, 45.80°N;<br>250 m a.s.l      | 2021–2023                                  | 438.67 ± 1.42                            | WDCGG <sup>d</sup>                                     |
| Kresin u Pacova (KRE), Czech Republic                 | Regional background <sup>#</sup> | 15.08°E, 49.58°N;<br>544 m a.s.l     | 2021–2023                                  | 427.05 ± 0.64                            | WDCGG <sup>d</sup>                                     |
| Observatoire Pérenne de l'Environnement (OPE), France | Regional background <sup>#</sup> | 5.50°E, 48.56°N;<br>400 m a.s.l      | 2021–2023                                  | 427.00 ± 0.75                            | WDCGG <sup>d</sup>                                     |
| Saclay (SAC), France                                  | Regional background <sup>#</sup> | 2.14°E, 48.72°N;<br>175 m a.s.l      | 2021–2023                                  | 430.76 ± 1.31                            | WDCGG <sup>d</sup>                                     |
| Torfhaus (TOH), Germany                               | Regional background <sup>#</sup> | 10.53°E, 51.81°N;<br>948 m a.s.l     | 2021–2023                                  | 421.08 ± 0.57                            | WDCGG <sup>d</sup>                                     |
| ABLECAS site, Zhejiang, China                         | High-altitude mountain           | 119.51°E, 28.58°N;<br>1128 m a.s.l   | 2022/7/10–<br>2021/6/20                    | 426.3 ± 10.0                             | Ye et al. (2024)                                       |
| Damingshan (DMS), Zhejiang, China                     | High-altitude mountain           | 119.00°E, 30.01°N;<br>1489.9 m a.s.l | 2020/11–<br>2021/10;<br>2021/4–<br>2022/12 | 422.02 ± 10.67;<br>419.38 ± 2.30*        | Chen et al. (2024);<br>This study                      |
| Shanghai Tower (SHT), Shanghai, China                 | Urban <sup>#</sup>               | 121.51°E, 31.23°N;<br>637.0 m a.s.l. | 2021/4/17–<br>2023/3/6                     | 433.50 ± 0.33*                           | This study                                             |
|                                                       |                                  |                                      | Spring                                     | 428.16 ± 0.45*                           |                                                        |
|                                                       |                                  |                                      | Summer                                     | 426.98 ± 0.49*                           |                                                        |
|                                                       |                                  |                                      | Autumn                                     | 437.55 ± 0.65*                           |                                                        |
|                                                       |                                  |                                      | Winter                                     | 440.73 ± 0.86*                           |                                                        |
| Global Annual Mean                                    |                                  |                                      | 2021–2022                                  | 415.7 ± 0.20–<br>417.9 ± 0.20            | WMO (2022, 2023) <sup>b</sup>                          |

<sup>a</sup> Derived from NOAA (available at: <https://gml.noaa.gov/dv/iadv/>, last access: August 2025); <sup>b</sup> Retrieved from WMO Greenhouse Gas Bulletin, No. 18–26 & 19–15 (available at: <https://library.wmo.int/records/>, last access: 9 September 2025); <sup>c</sup> Retrieved from China Greenhouse Gas Bulletin (available at: <https://www.cma.gov.cn/zfxxgk/gknr/qxbg/>, last access: 10 September 2025); <sup>d</sup> Derived from WDCGG (available at: <https://gaw.kishou.go.jp/>, last access: November 2025); <sup>#</sup> Based on the tower platform; \*Values are presented as mean ± 95% CI for SHT and DMS, and as mean ± SD for other sites.

**Table S2:** Observed CO<sub>2</sub> (ppm) and CO (ppb) mole fractions at the SHT site and their relative excesses above background levels.

| Periods         | CO <sub>2</sub> | CO <sub>2, bk</sub> | CO <sub>2, ex</sub><br>(ff; bio-dominated) | CO            | CO <sub>bk</sub> | CO <sub>ex</sub> |
|-----------------|-----------------|---------------------|--------------------------------------------|---------------|------------------|------------------|
| Spring          | 427.7 ± 12.7    | 423.2 ± 7.9         | 4.4 (3.7; 0.7)                             | 199.7 ± 138.0 | 162.5 ± 92.1     | 37.2             |
| Summer          | 424.9 ± 12.0    | 420.5 ± 5.8         | 4.4 (6.4; -2.0)                            | 252.3 ± 187.3 | 152.3 ± 65.6     | 100.0            |
| Autumn          | 437.2 ± 19.4    | 428.9 ± 10.0        | 8.3 (7.1; 1.2)                             | 428.5 ± 346.3 | 281.1 ± 162.9    | 147.4            |
| Winter          | 443.8 ± 24.5    | 432.4 ± 15.5        | 11.4 (8.3; 3.1)                            | 387.1 ± 304.5 | 278.3 ± 170.9    | 108.7            |
| No-rain periods | 434.4 ± 19.9    | 426.9 ± 11.7        | 7.5 (6.4; 1.1)                             | 325.7 ± 283.4 | 226.8 ± 149.3    | 98.9             |

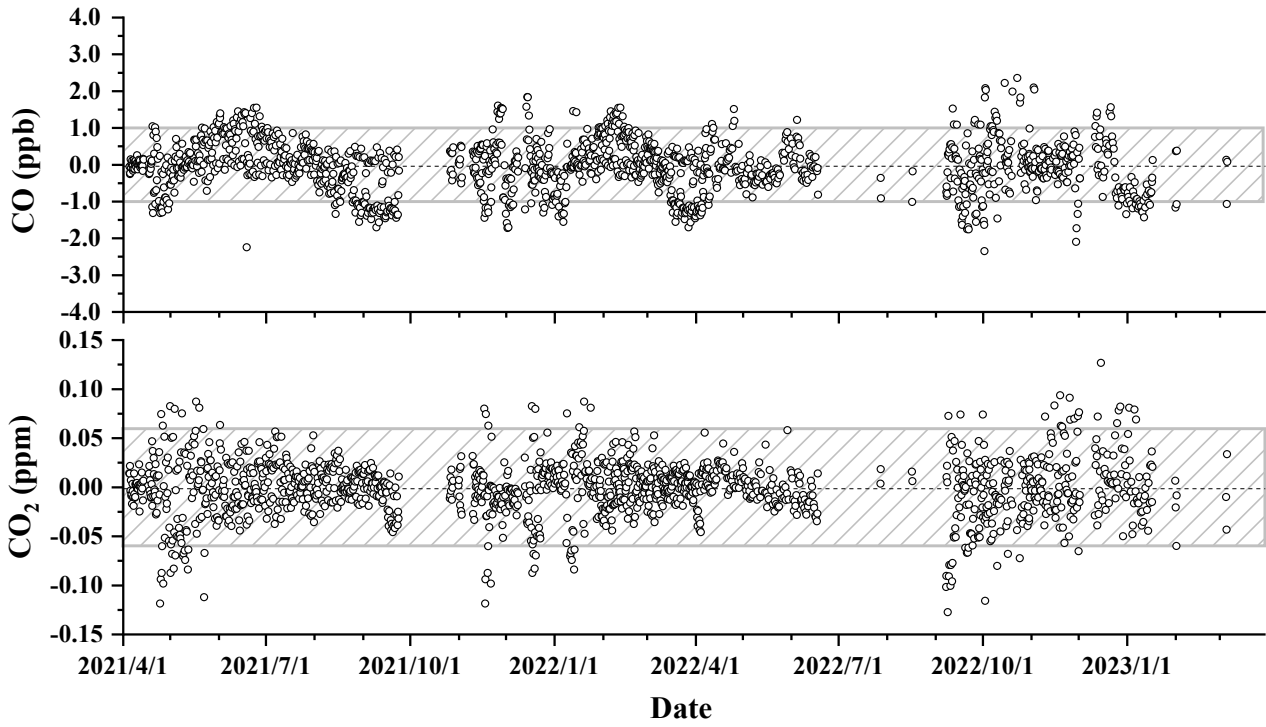

**Figure S1:** Differences of the measured and assigned CO and CO<sub>2</sub> mole fractions for the target gas (T) during the observation period. The gray shaded area represents the  $\pm 1\sigma$  range.

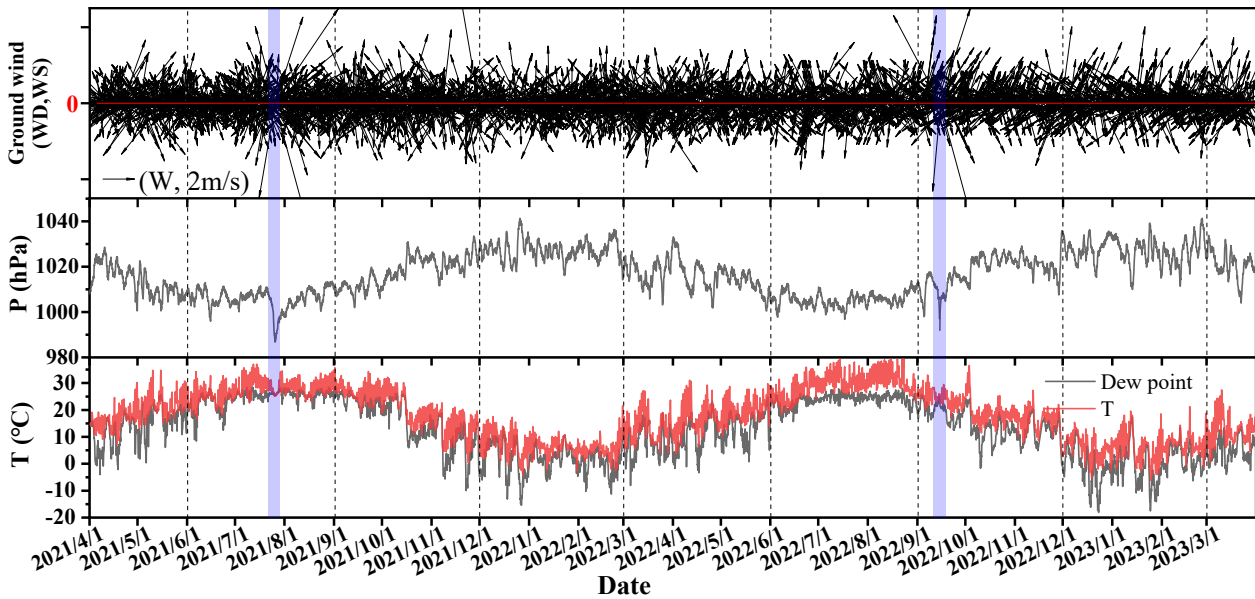

**Figure S2:** The time series of the ground wind, air pressure and temperature during this campaign with a 3-h time resolution from Baoshan Meteorological Station (BS; 31.23°N, 121.29°E; 20.9 km from SHT). Blue shaded areas mark typhoon events (July 25–26, 2021, and September 14–15, 2022).



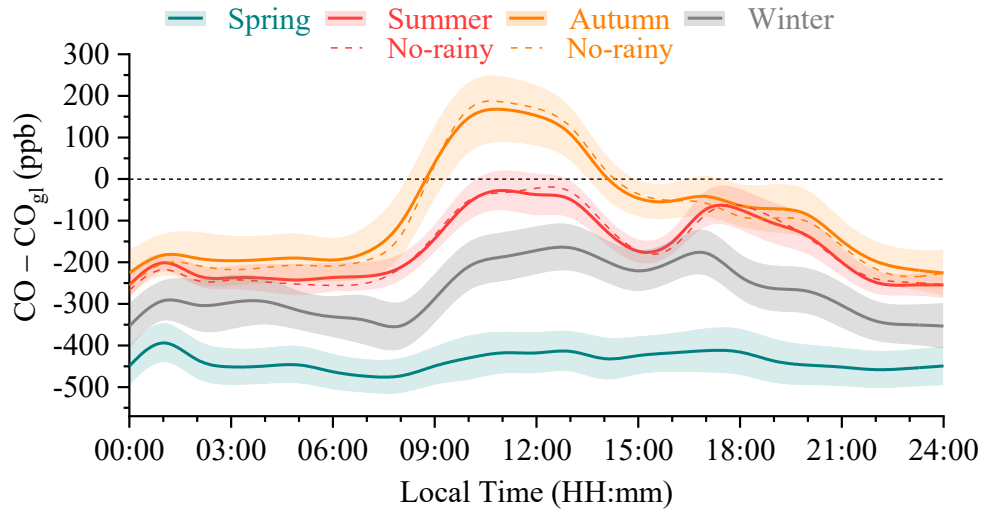

**Figure S5:** The variations on concentration differences of CO between the tower top (expressed as  $CO_{st}$  here) and the ground ( $CO_{gf}$ ).

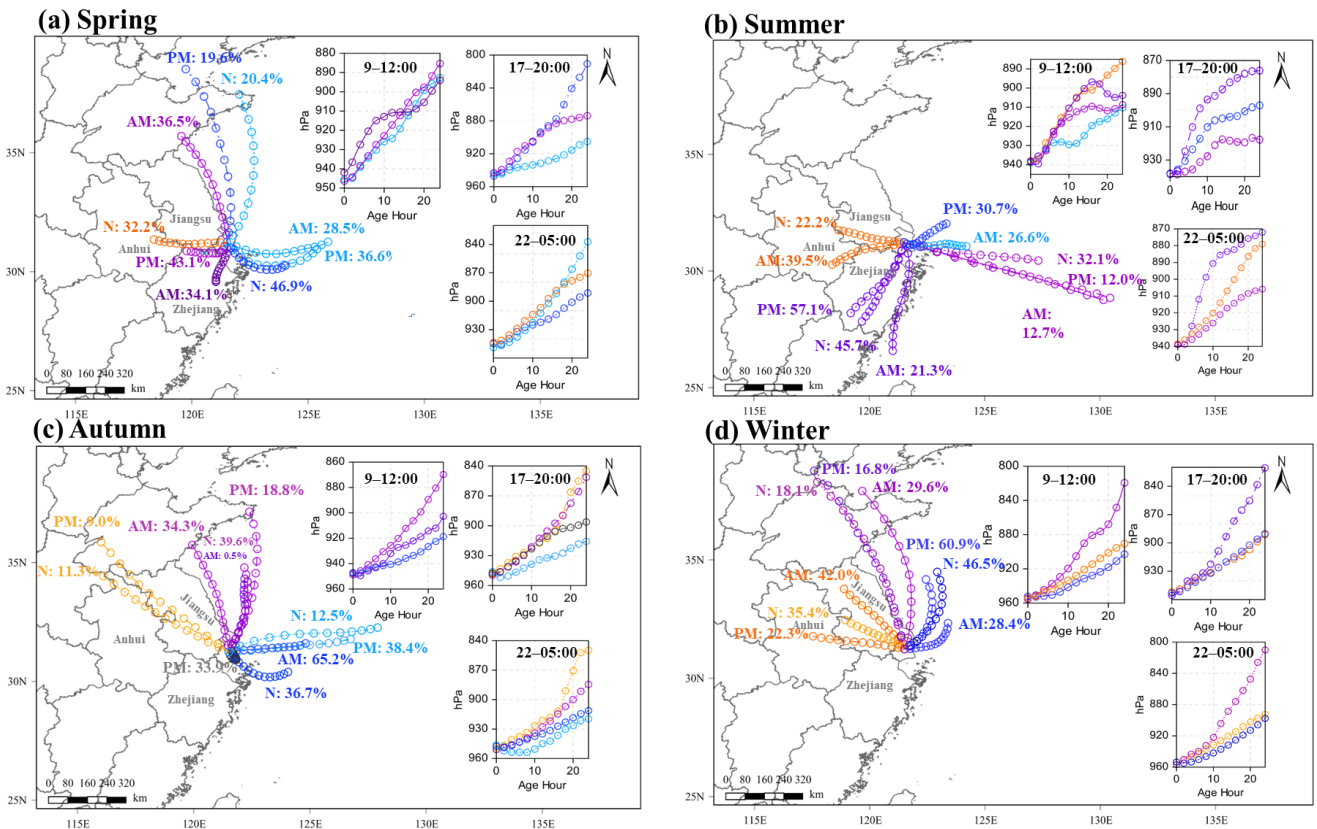

**Figure S6:** Cluster analysis of the 24-h back trajectories at SHT site for the AM (9:00–12:00), PM (17:00–20:00), and N (22:00–05:00) periods.

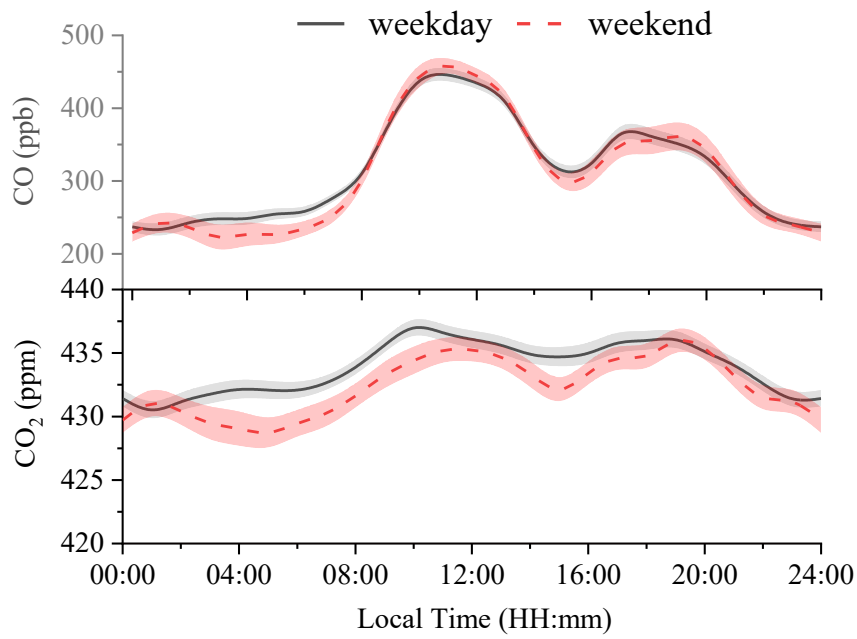

**Figure S7:** The diurnal variations of atmospheric CO<sub>2</sub> and CO between weekdays and weekends at the SHT site.

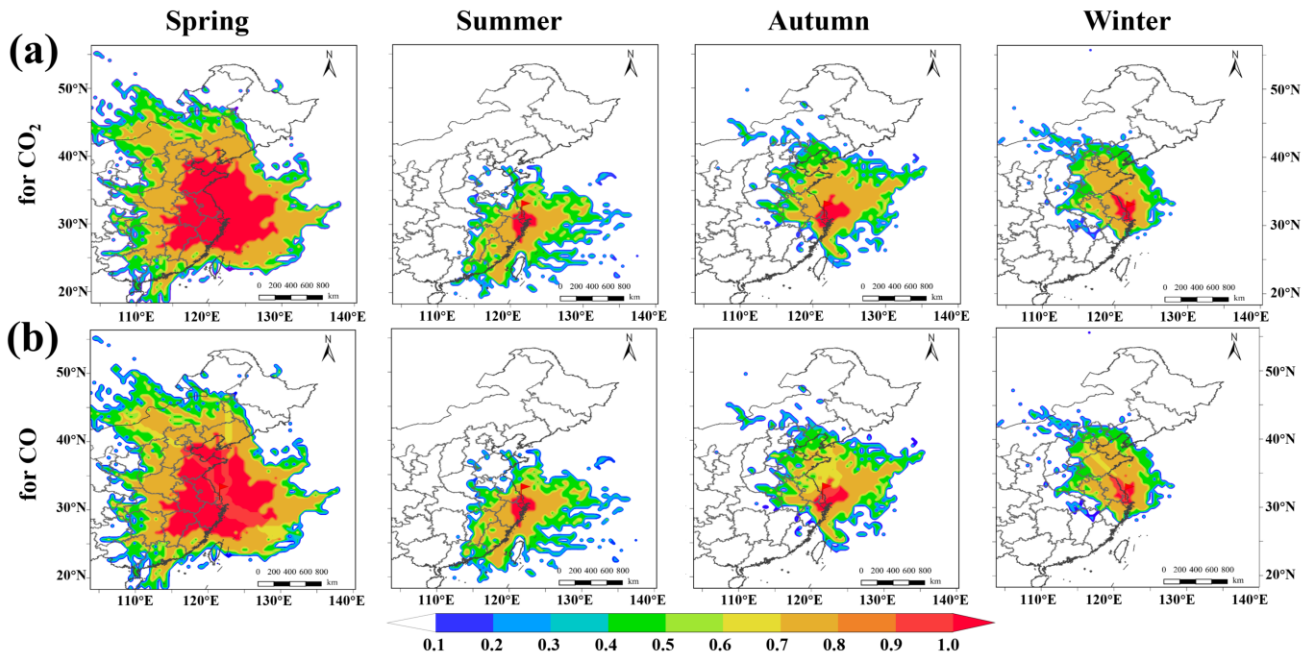

**Figure S8:** The spatial contribution of potential sources using the Weighted Potential Source Contribution Function (WPSCF; see main text Section 2.2) based on 3-day back trajectories.

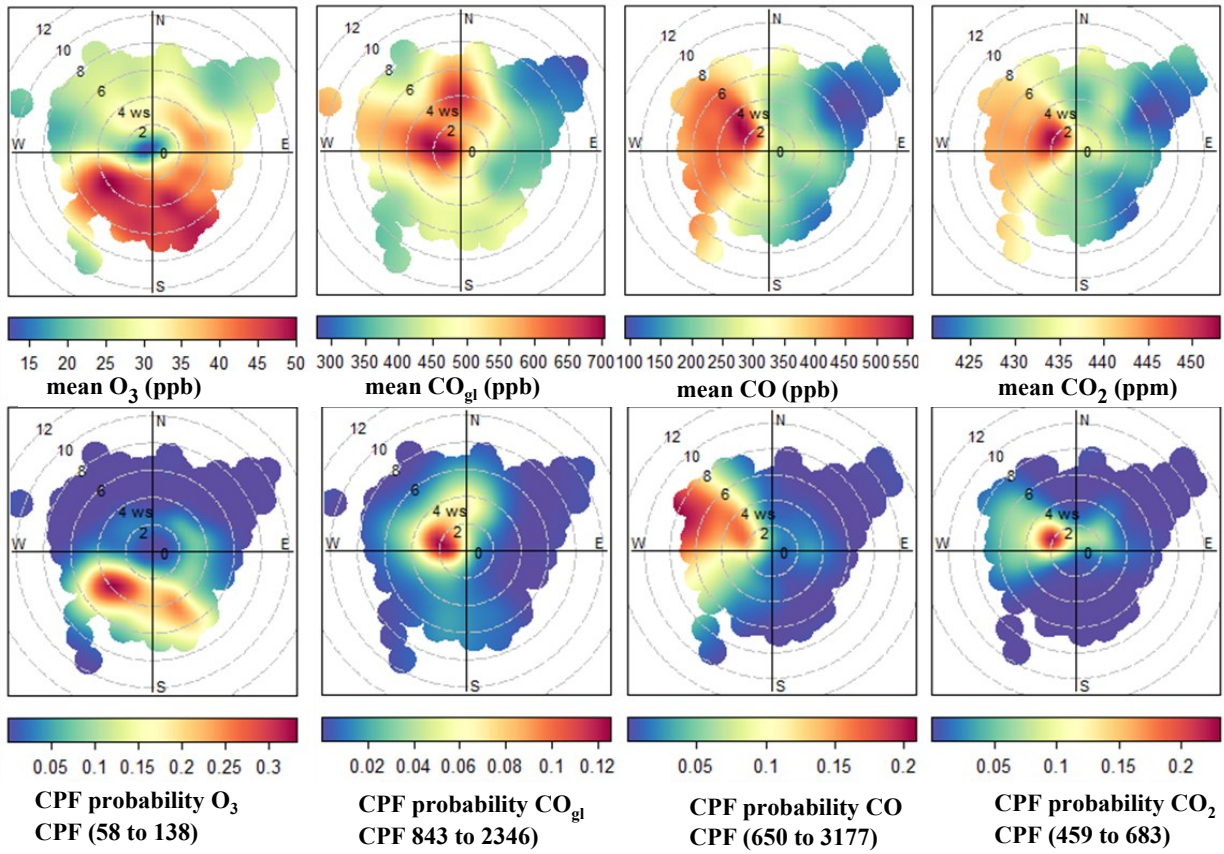

**Figure S9:** The wind rose plots of ground-level O<sub>3</sub> and CO, and tower-top CO and CO<sub>2</sub> measurements and the corresponding Conditional Probability Function (CPF) statistics for their upper 10% values.

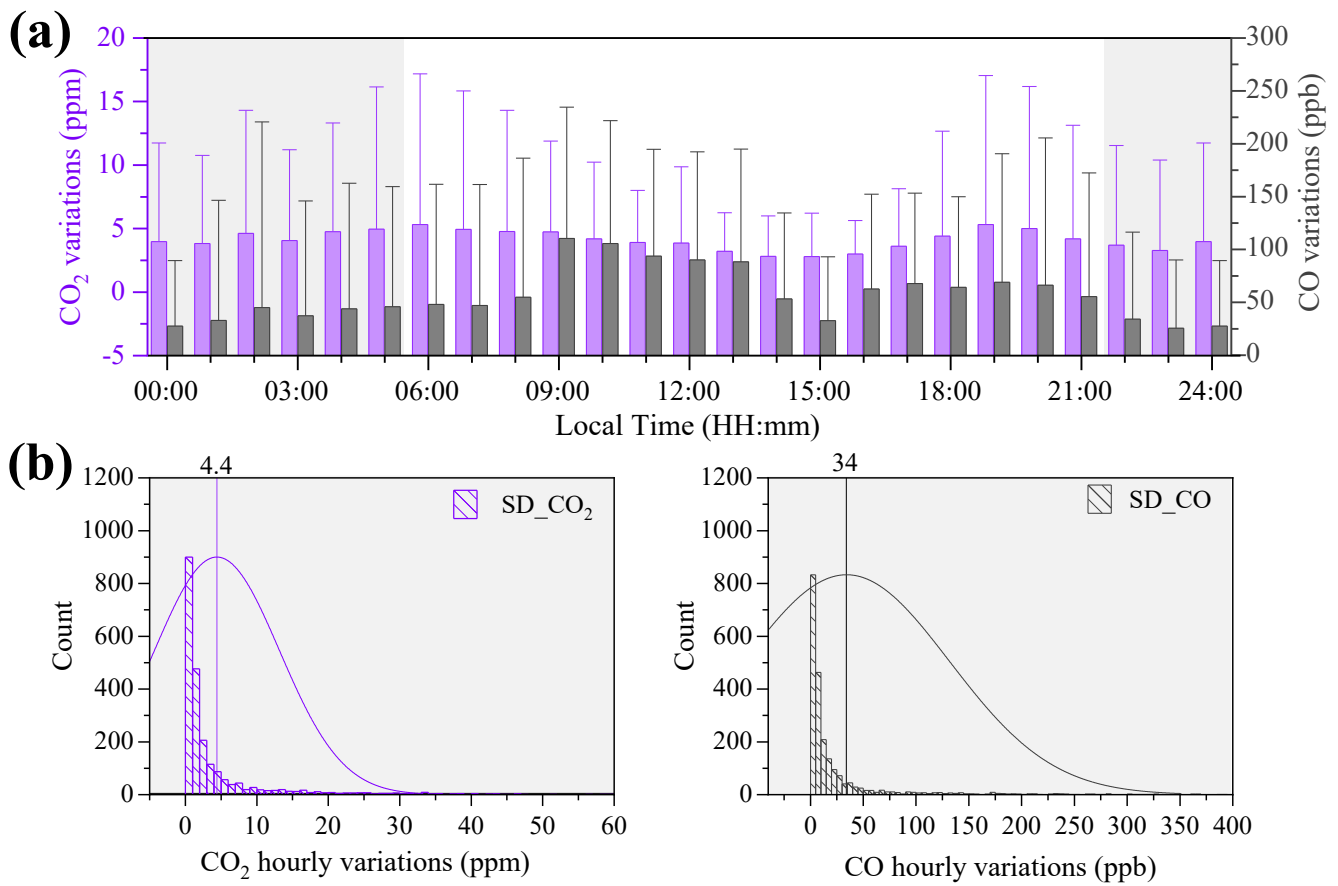

**Figure S10:** Mean diurnal cycles of CO<sub>2</sub> and CO variations (hourly standard deviation, SD, at SHT) and their distributions based on 1-h resolution data.

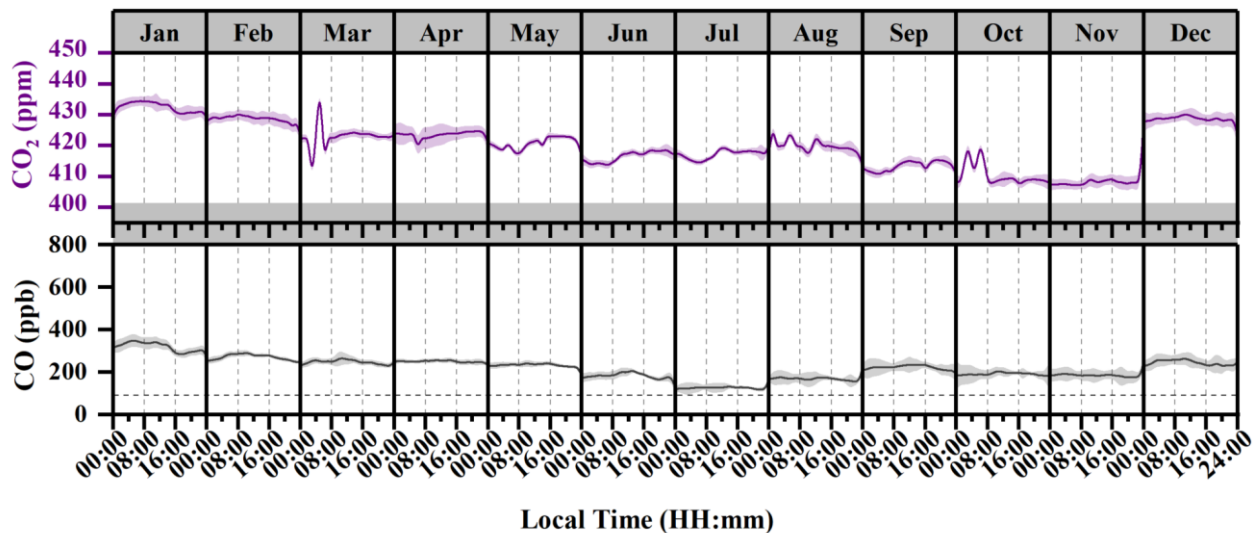

**Figure S11:** The averaged diurnal cycles of atmospheric CO<sub>2</sub> and CO concentrations over different months measured at the DMS site during April 2021–December 2022.

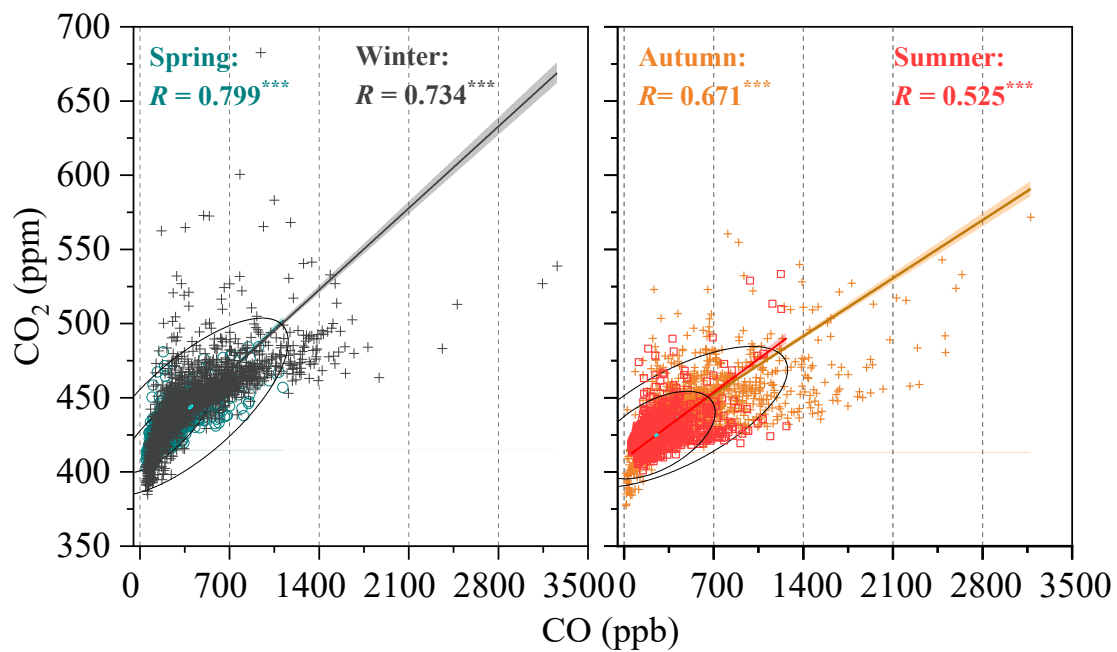

**Figure S12:** Correlations of concurrent CO<sub>2</sub> and CO measurements of different seasons at SHT site.

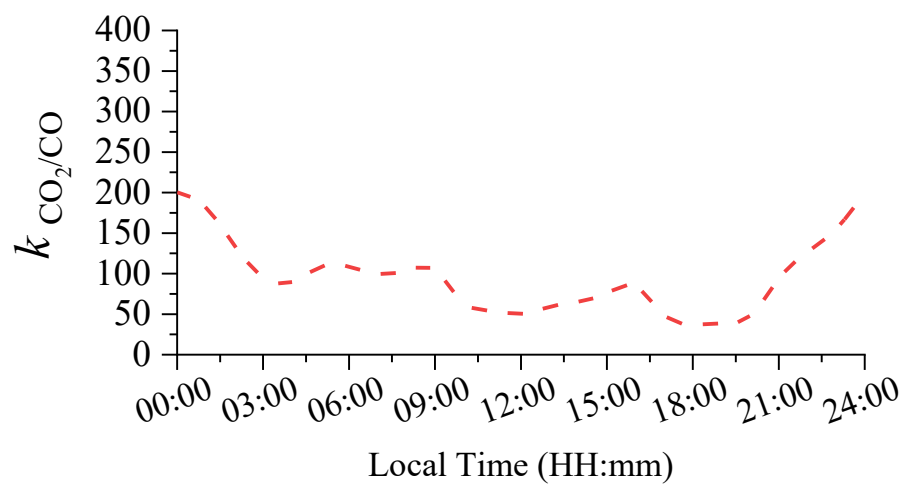

**Figure S13:** Time-dependent  $k_{\text{CO}_2/\text{CO}}$  as a function of local time in summer for the SHT site.

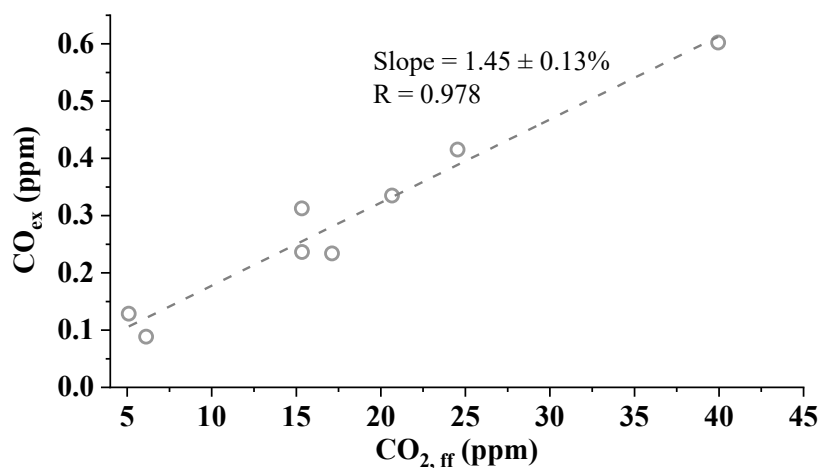

**Figure S14:** Correlations between the mole fractions of excess CO ( $\text{CO}_{\text{ex}}$ ) and fossil fuels-derived  $\text{CO}_2$  ( $\text{CO}_{2,\text{ff}}$ ) at the site of Hengxiwu (HXW, 119.48°E, 30.60°N; 200 m a.s.l.) in the Yangtze River Delta (YRD) region. The  $\text{CO}_{\text{ex}}$  was estimated relative to the background station WLG, representative of the Northern Hemisphere mid-latitude interior. The  $\text{CO}_{2,\text{ff}}$  was quantified using the  $\text{CO}_2\text{-}\Delta^{14}\text{C}$  method, according to Levin et al. (2003) and Vásquez et al. (2022).

## References

- Chen, Y., Lu, Y., Qi, B., Ma, Q., Zang, K., Lin, Y., Liu, S., Pan, F., Li, S., Guo, P., Chen, L., Lan, W., and Fang, S.: Atmospheric CO<sub>2</sub> in the megacity Hangzhou, China: Urban-suburban differences, sources and impact factors, *Sci. Total Environ.*, 926, <https://doi.org/10.1016/j.scitotenv.2024.171635>, 2024.
- Levin, I., Kromer, B., Schmidt, M., and Sartorius, H.: A novel approach for independent budgeting of fossil fuel CO<sub>2</sub> over Europe by <sup>14</sup>CO<sub>2</sub> observations, *Geophys. Res. Lett.*, 30, <https://doi.org/10.1029/2003GL018477>, 2003.
- Park, C., Jeong, S., Shin, Y.-s., Cha, Y.-s., and Lee, H.-c.: Reduction in urban atmospheric CO<sub>2</sub> enhancement in Seoul, South Korea, resulting from social distancing policies during the COVID-19 pandemic, *Atmos. Pollut. Res.*, 12, 101176, <https://doi.org/10.1016/j.apr.2021.101176>, 2021.
- Vásquez, M., Lara, W., Valle, J. I. D., and Sierra, C.: Reconstructing past fossil-fuel CO<sub>2</sub> concentrations using tree rings and radiocarbon in the urban area of Medellín, Colombia, *Environ. Res. Lett.*, 17, 055008, <https://doi.org/10.1088/1748-9326/ac63d4>, 2022.
- Ye, J., Zhang, Y., Yao, W., Liu, H., Lei, S., Zhang, Y., Zhang, J., Li, S., Lv, S., Wu, L., Tang, X., Sun, Y., Xin, J., Li, J., Wang, Z., Liu, L., Su, H., and Pan, X.: Significant shift of footprint patterns and pollutant source contributions: insights from observations at Shanghuang observatory, East China, *Environ. Res. Lett.*, 19, <https://doi.org/10.1088/1748-9326/ad8369>, 2024.
- Zhao, Z., He, Q., Lu, Z., Zhao, Q., and Wang, J.: Analysis of atmospheric CO<sub>2</sub> and CO at Akedala atmospheric background observation station, a regional station in Northwestern China, *Int. J. Environ. Res. Public Health*, 19, <https://doi.org/10.3390/ijerph19116948>, 2022.
